# Supplementary material for: Cellulose and lignin biosynthesis is altered by ozone in wood of hybrid poplar (Populus tremula×alba)
Source: PubMed Central journal article supplement — J Exp Bot. 2011 Feb 28;62(10):3575–86. doi: 10.1093/jxb/err047 (PMC3130179; doi:10.1093/jxb/err047), 2011-02-28
Supplement: supp_err047_00054833-file001.pdf [file supp_err047_00054833-file001.pdf]

Cellulose and lignin biosynthesis is altered by ozone in wood of hybrid poplar (*Populus tremula* x *alba*)

Nicolas Richet, Dany Afif, Françoise Huber, Brigitte Pollet, Jacques Banvoy, Rana El Zein, Catherine Lapierre, Pierre Dizengremel, Patrick Perré, Mireille Cabané

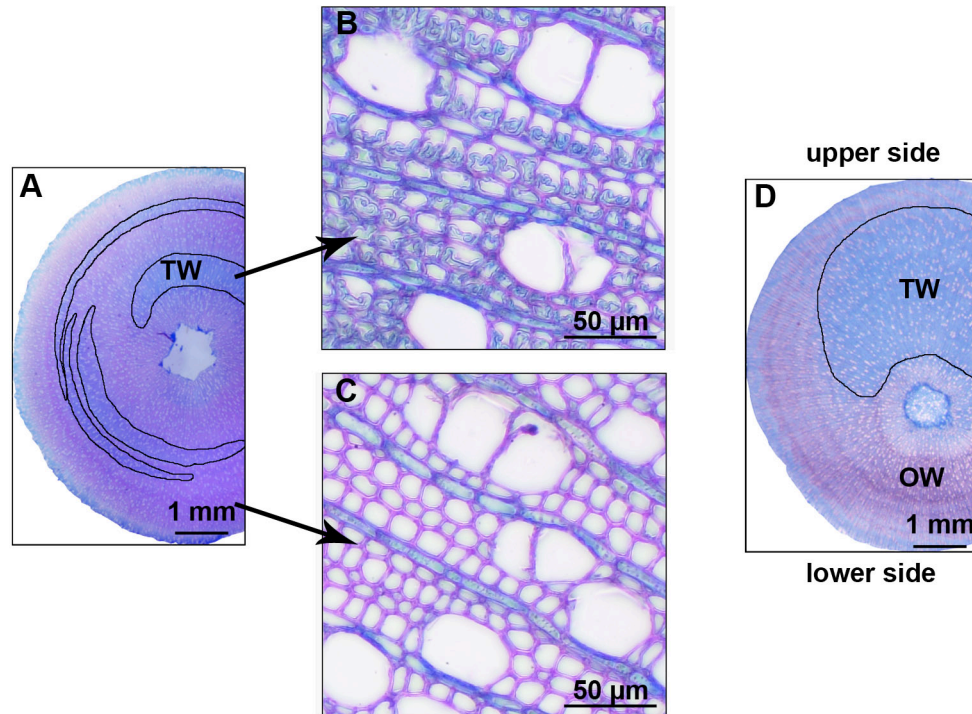

**Fig. S1.** Photomicrographs of stem cross sections stained with safranin O/Astra blue showing tension wood crescents (blue colour) with non-defined pattern in straight poplars (A). Blue coloured areas (B) displayed typical fibres with G-layers encountered in tension wood and pink areas showed ‘normal’ fibres (C). In bent poplars, tension wood was located at the upper side of the stem and opposite wood (or normal wood) at the lower side (D). TW: tension wood; OW: opposite wood.

**Table S1.** Lignin-derived monomers (H, G, S) and S/G ratio after thioacidolysis of tension wood or opposite wood at different stem levels from poplars cultivated for 46 days under control conditions or different ozone concentrations.

| Treatment                     | Tension wood                                             |                     |                |                |                 | Opposite wood                                            |                     |                |                |                 |
|-------------------------------|----------------------------------------------------------|---------------------|----------------|----------------|-----------------|----------------------------------------------------------|---------------------|----------------|----------------|-----------------|
|                               | Yield in H+G+S monomers ( $\mu\text{mol g}^{-1}$ lignin) | % of monomers (w/w) |                |                | S/G             | Yield in H+G+S monomers ( $\mu\text{mol g}^{-1}$ lignin) | % of monomers (w/w) |                |                | S/G             |
|                               |                                                          | H                   | G              | S              |                 |                                                          | H                   | G              | S              |                 |
| Lower stem                    |                                                          |                     |                |                |                 |                                                          |                     |                |                |                 |
| Control                       | 1987 $\pm$ 58                                            | 0.40 $\pm$ 0.05     | 34.6 $\pm$ 1.1 | 65.0 $\pm$ 1.1 | 1.88 $\pm$ 0.09 | 2175 $\pm$ 50                                            | 0.63 $\pm$ 0.03     | 36.0 $\pm$ 0.6 | 63.4 $\pm$ 0.6 | 1.76 $\pm$ 0.05 |
| Ozone, 50 nl l <sup>-1</sup>  | 2090 $\pm$ 41                                            | 0.46 $\pm$ 0.03     | 32.9 $\pm$ 0.5 | 66.6 $\pm$ 0.5 | 2.02 $\pm$ 0.05 | 2123 $\pm$ 33                                            | 0.64 $\pm$ 0.07     | 34.6 $\pm$ 0.3 | 64.8 $\pm$ 0.4 | 1.87 $\pm$ 0.03 |
| Ozone, 100 nl l <sup>-1</sup> | 1952 $\pm$ 42                                            | 0.50 $\pm$ 0.06     | 33.6 $\pm$ 0.7 | 65.9 $\pm$ 0.6 | 1.97 $\pm$ 0.06 | 2083 $\pm$ 0.37                                          | 0.66 $\pm$ 0.06     | 35.0 $\pm$ 1.1 | 64.4 $\pm$ 1.1 | 1.85 $\pm$ 0.09 |
| Ozone, 200 nl l <sup>-1</sup> | 2029 $\pm$ 17                                            | 0.44 $\pm$ 0.07     | 32.7 $\pm$ 1.1 | 66.9 $\pm$ 1.1 | 2.05 $\pm$ 0.10 | 2062 $\pm$ 58                                            | 0.57 $\pm$ 0.08     | 35.6 $\pm$ 0.5 | 63.8 $\pm$ 0.6 | 1.79 $\pm$ 0.04 |
| Ozone, 300 nl l <sup>-1</sup> | 2013 $\pm$ 36                                            | 0.44 $\pm$ 0.05     | 33.1 $\pm$ 1.3 | 66.4 $\pm$ 1.3 | 2.01 $\pm$ 0.11 | 2128 $\pm$ 22                                            | 0.69 $\pm$ 0.12     | 34.2 $\pm$ 0.8 | 65.1 $\pm$ 0.9 | 1.91 $\pm$ 0.08 |
| Middle stem                   |                                                          |                     |                |                |                 |                                                          |                     |                |                |                 |
| Control                       | 2213 $\pm$ 37                                            | 0.41 $\pm$ 0.02     | 33.1 $\pm$ 0.3 | 66.5 $\pm$ 0.3 | 2.01 $\pm$ 0.03 | 2300 $\pm$ 167                                           | 0.52 $\pm$ 0.01     | 35.0 $\pm$ 1.0 | 64.5 $\pm$ 0.9 | 1.84 $\pm$ 0.07 |
| Ozone, 50 nl l <sup>-1</sup>  | 1947 $\pm$ 215                                           | 0.41 $\pm$ 0.03     | 34.4 $\pm$ 2.2 | 65.2 $\pm$ 2.2 | 1.90 $\pm$ 0.18 | 2138 $\pm$ 53                                            | 0.55 $\pm$ 0.01     | 35.8 $\pm$ 1.2 | 63.7 $\pm$ 1.1 | 1.78 $\pm$ 0.09 |
| Ozone, 100 nl l <sup>-1</sup> | 2104 $\pm$ 217                                           | 0.41 $\pm$ 0.02     | 34.6 $\pm$ 1.1 | 65.0 $\pm$ 1.1 | 1.88 $\pm$ 0.09 | 2076 $\pm$ 213                                           | 0.52 $\pm$ 0.03     | 36.0 $\pm$ 1.2 | 63.5 $\pm$ 1.2 | 1.76 $\pm$ 0.09 |
| Ozone, 200 nl l <sup>-1</sup> | 2088 $\pm$ 48                                            | 0.45 $\pm$ 0.01     | 34.2 $\pm$ 0.4 | 65.3 $\pm$ 0.4 | 1.91 $\pm$ 0.04 | 2088 $\pm$ 198                                           | 0.49 $\pm$ 0.01     | 34.3 $\pm$ 1.2 | 65.2 $\pm$ 1.2 | 1.90 $\pm$ 0.10 |
| Ozone, 300 nl l <sup>-1</sup> | 2037 $\pm$ 12                                            | 0.50 $\pm$ 0.01     | 33.2 $\pm$ 0.9 | 66.4 $\pm$ 0.9 | 2.00 $\pm$ 0.08 | 2001 $\pm$ 28                                            | 0.59 $\pm$ 0.03     | 35.0 $\pm$ 0.8 | 64.4 $\pm$ 0.9 | 1.84 $\pm$ 0.07 |

Data are mean values (n=3, tree replicates)  $\pm$  SD.

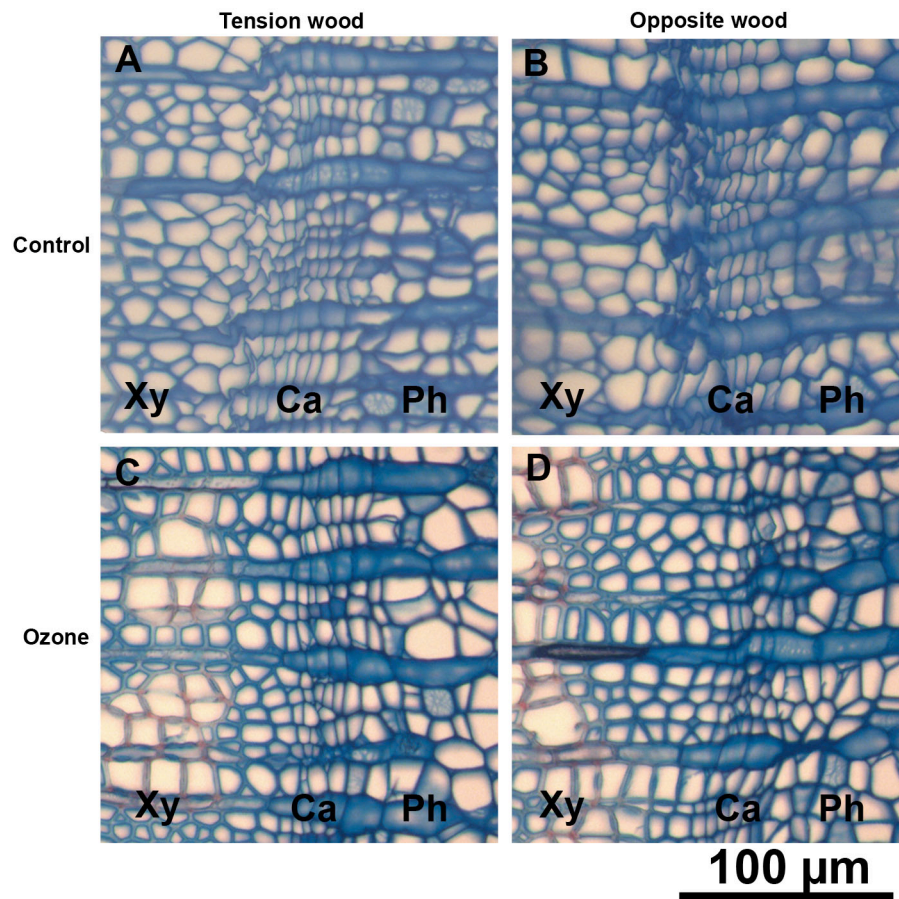

**Fig. S2.** Photomicrographs of cross section showing cambial zone in tension wood (A, C) and opposite wood (B, D) in stems (LS) of poplars cultivated for 46 days under control conditions (A, B) or in 200 nl l<sup>-1</sup> ozone (C, D). Ca, cambium; Ph, phloem; Xy, xylem.

Scale bar = 100 μm.
